# Supplementary material for: Benzothiazolium Derivative-Capped Silica Nanocomposites for β-Amyloid Imaging In Vivo
Source: PubMed Central journal article supplement (PMC8746709; doi:10.1021/acs.analchem.1c02289), 2021-09-08
Supplement: ac1c02289_si_001.pdf [file ac1c02289_si_001.pdf]

## Supporting Information

### **Benzothiazolium Derivatives Capped Silica Nanocomposites for $\beta$ -amyloid Imaging *in vivo***

Lijun Ma,<sup>†</sup> Shu Yang,<sup>§</sup> Yufan Ma,<sup>†</sup> Yuzhi Chen,<sup>†</sup> Zhenguo Wang,<sup>†</sup> Tony D. James,<sup>\*¶</sup> Xuefei Wang,<sup>\*</sup> Zhuo Wang<sup>\*†</sup>

<sup>†</sup> State Key Laboratory of Chemical Resource Engineering, College of Chemistry, Beijing Advanced Innovation Center for Soft Matter Science and Engineering, Beijing University of Chemical Technology, Beijing, 100029, China.

<sup>‡</sup> School of Chemistry and Chemical Engineering, University of Chinese Academy of Sciences, Beijing, 100049, China.

<sup>¶</sup> Department of Chemistry, University of Bath, BA2 7AY, UK.

<sup>§</sup> Department of Pharmacy, Beijing Tiantan Hospital, Capital Medical University, Beijing, 100070, China.

<sup>†</sup>Corresponding author's fax: +86-01-64434898

<sup>†</sup>Corresponding emails: wangzhuo77@mail.buct.edu.cn

<sup>‡</sup>Corresponding emails:wangxf@ucas.ac.cn

<sup>¶</sup>Corresponding emails:T.D.James@bath.ac.uk

## Table of Contents.

|                                                                                         |     |
|-----------------------------------------------------------------------------------------|-----|
| Table S1. Properties of four different MSN.....                                         | S3  |
| Table S2. The spectral data of probes.....                                              | S3  |
| Figure S1. The relationship between dihedral angle and transmission energy.....         | S4  |
| Table S3. The relationship between oscillator strength and dihedral angle.....          | S5  |
| Table S4. The autodocking data between ThT and A $\beta_{1-42}$ aggregates model.....   | S5  |
| Table S5. The autodocking data between SZI-1 and A $\beta_{1-42}$ aggregates model..... | S6  |
| Table S6. The autodocking data between SZI-2 and A $\beta_{1-42}$ aggregates model..... | S6  |
| Table S7. The autodocking data between SZI-3 and A $\beta_{1-42}$ aggregates model..... | S7  |
| Figure S2. The viscosity response characteristics of SZIs.....                          | S7  |
| Figure S3. The selectivity of SZIs.....                                                 | S7  |
| Figure S4. TEMs of A $\beta_{1-42}$ aggregates.....                                     | S8  |
| Figure S5. The fluorescence response of ThT to A $\beta_{1-42}$ aggregates.....         | S8  |
| Figure S6. <i>In vivo</i> BBB penetration test.....                                     | S8  |
| Table S8. Comparison of our probes with reported probes.....                            | S9  |
| Figure S7. The wide range TEM of MSN-NH <sub>2</sub> .....                              | S10 |
| Figure S8. The particle size distribution of different MSN nanoparticles.....           | S10 |
| Figure S9. The FTIR image of before and after the removal of CTAC in MSN.....           | S10 |
| Figure S10. The absorption spectrum of SZI-1 in different solvent.....                  | S12 |
| Figure S11. The fluorescence intensity of SZI-1 in different solvent.....               | S12 |
| Figure S12. The absorption spectrum of SZI-2 in different solvent.....                  | S14 |
| Figure S13. The fluorescence intensity of SZI-2 in different solvent.....               | S14 |
| Figure S14. The absorbance and fluorescence intensity of MSN-Lf@SZI-1.....              | S15 |
| Figure S15. The absorbance and fluorescence intensity of MSN-Lf@SZI-2.....              | S15 |
| Figure S16. The CLSM images of MSN-Lf@SZIs.....                                         | S16 |
| Figure S17. Photostability of SZI-1 and SZI-2.....                                      | S16 |
| Table S9. The conditions used for LC-MS analysis.....                                   | S17 |
| Table S10. Biodistribution of SZI-1 and SZI-2 in the brains of KM mice.....             | S17 |
| Figure S18. The representative LC-MS data of SZI-1.....                                 | S18 |
| Figure S19. The representative LC-MS data of SZI-2.....                                 | S19 |
| Figure S20. The representative mass spectrometry data of SZIs and SZIs in brain.....    | S20 |
| Figure S21-S32. Characterization data of probes.....                                    | S21 |

Table S1. Properties of four different MSN.

| Sample              | TEA<br>[g] | Pore diameter<br>[nm] | TEM<br>average<br>diameter<br>[nm] | DLS<br>average<br>diameter<br>[nm] | PDI   | Zeta<br>potential<br>[mV] |
|---------------------|------------|-----------------------|------------------------------------|------------------------------------|-------|---------------------------|
| MSN                 | 0.08       | 2.7                   | 40                                 | 46.80                              | 0.177 | -20.08                    |
| MSN-NH <sub>2</sub> | /          | /                     | 40                                 | 60.06                              | 0.221 | 17.64                     |
| MSN-PEG             | /          | /                     | 40                                 | 53.40                              | 0.394 | 19.91                     |
| MSN-Lf              | /          | /                     | 50                                 | 60.41                              | 0.243 | 8.80                      |
| MSN-<br>Lf@SZIs     | /          | /                     | 50                                 | /                                  | /     | 5.67                      |

Table S2. The spectral data of probes.

| Probes | Sovents | Ex<br>[nm] | Em<br>[nm] <sup>a)</sup> | Stokes<br>shift<br>[nm] | Absolute<br>Quantum<br>Yield<br>[%] | FL<br>Intensity<br>(Em,with<br>Aβ)<br>[nm] <sup>a)</sup> | Fold <sup>b)</sup> | Clog<br>P <sup>c)</sup> | Kd<br>[nM]<br><sup>d)</sup> | ε<br>[L·mol <sup>-1</sup> cm <sup>-1</sup> ]<br><sup>e)</sup> |
|--------|---------|------------|--------------------------|-------------------------|-------------------------------------|----------------------------------------------------------|--------------------|-------------------------|-----------------------------|---------------------------------------------------------------|
| SZI-1  | THF     | 527        | 600                      | 73                      | 19.2%                               | n.d.                                                     | 3                  | 0.20                    | 507.6<br>±94.7<br>5         | 6897.168                                                      |
|        | Ethanol | 526.5      | 592                      | 65.5                    |                                     | n.d.                                                     |                    |                         |                             | 5926.568                                                      |
|        | DMSO    | 524.5      | 608                      | 83.5                    |                                     | n.d.                                                     |                    |                         |                             | 7038.538                                                      |
|        | PDO     | 531        | 595                      | 64                      |                                     | n.d.                                                     |                    |                         |                             | 8663.449                                                      |
|        | PBS     | 510        | 593                      | 83                      |                                     | 2283                                                     |                    |                         |                             | 7481.385                                                      |
| SZI-2  | THF     | 568.5      | 702                      | 133.5                   | 30.75%                              | n.d.                                                     | 1.7                | 1.26                    | 600.6<br>±94.8<br>2         | 4944.128                                                      |
|        | Ethanol | 569.5      | 693                      | 123.5                   |                                     | n.d.                                                     |                    |                         |                             | 4030.88                                                       |
|        | DMSO    | 558.5      | 711                      | 152.5                   |                                     | n.d.                                                     |                    |                         |                             | 5044.181                                                      |
|        | PDO     | 575.5      | 692                      | 116.5                   |                                     | n.d.                                                     |                    |                         |                             | 5574.688                                                      |
|        | PBS     | 521        | 688                      | 167                     |                                     | 778.3                                                    |                    |                         |                             | 5058.816                                                      |
| SZI-3  | THF     | 559        | 812                      | 253                     | n.d.                                | n.d.                                                     | n.d.               | 2.19                    | n.d.                        | 1872.063                                                      |
|        | Ethanol | 559        | 810                      | 251                     |                                     | n.d.                                                     |                    |                         |                             | 3354.34                                                       |
|        | DMSO    | 554        | 815                      | 261                     |                                     | n.d.                                                     |                    |                         |                             | 3433.34                                                       |
|        | PDO     | 561        | 809                      | 248                     |                                     | n.d.                                                     |                    |                         |                             | 3986.34                                                       |
|        | PBS     | 518        | 803                      | 285                     |                                     | n.d.                                                     |                    |                         |                             | 3652.17                                                       |

a) Set b = 10 for a specific emission wavelength.

b) The calculation of the fluorescence enhancement fold was calculated based on the fluorescence ratio before and after binding to Aβ.

c) The ClogP was calculated by ALOGPS 2.1 program

(<http://146.107.217.178/lab/alogps/start.html>)

n.d. refers to not determined.

d) Kd value refers to dissociation constant, which was given as best-fit values  $\pm$  Std.

Error. The Kd value was calculated by Graphpad Prism 5.0 Software with nonlinear

regression (one site-specific binding) method. The Kd was calculated by the following

formula:

$$Y = \frac{B_{max} \cdot X}{k_d + X}$$

where X is the concentration of probes, Y is change in fluorescence intensity,  $B_{max}$  is

the maximum specific binding has the same units as Y, Kd is the equilibrium binding

constant.

e)  $\epsilon$  was calculated by Lambert-Beer law.

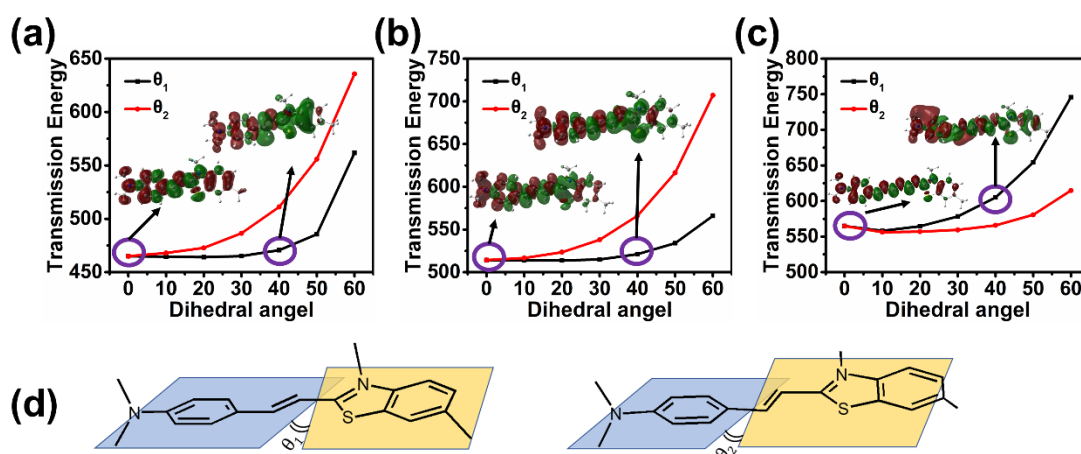

Figure S1. The relationship between dihedral angle and transmission energy. (a) SZI-1.

(b) SZI-2. (c) SZI-3. (d) Description of the distortion method in the molecule used for calculation.

Table S3. The relationship between oscillator strength and dihedral angle.

| Dihedral<br>(°) | SZI-1      |            | SZI-2      |            | SZI-3      |            |
|-----------------|------------|------------|------------|------------|------------|------------|
|                 | $\theta_1$ | $\theta_2$ | $\theta_1$ | $\theta_2$ | $\theta_1$ | $\theta_2$ |
| 0               | 1.49       | 1.49       | 2.0        | 2.0        | 2.47       | 2.47       |
| 10              | 1.5        | 1.46       | 2.0        | 1.97       | 2.53       | 2.57       |
| 20              | 1.46       | 1.42       | 1.96       | 1.89       | 2.49       | 2.4        |
| 30              | 1.4        | 1.3        | 1.8        | 1.71       | 2.4        | 2.2        |
| 40              | 1.27       | 1.1        | 1.7        | 1.44       | 2.19       | 1.8        |
| 50              | 1.0        | 0.8        | 1.4        | 1.08       | 1.89       | 1.36       |
| 60              | 0.6        | 0.5        | 0.9        | 0.7        | 1.31       | 0.87       |

Table S4. The autodocking data between ThT and A $\beta_{1-42}$  aggregates model.

| Rank<br>SunRank | Binding<br>Energy<br>[kcal/mol] | Torsional<br>Energy<br>[kcal/mol] | Intermolecular<br>Energy<br>[kcal/mol] | Internal<br>Energy<br>[kcal/mol] | Unbound<br>Extended Energy<br>[kcal/mol] |
|-----------------|---------------------------------|-----------------------------------|----------------------------------------|----------------------------------|------------------------------------------|
| 1_1             | -6.63                           | 0.6                               | -7.23                                  | -0.39                            | -0.39                                    |
| 1_2             | -6.6                            | 0.6                               | -7.2                                   | -0.42                            | -0.42                                    |
| 1_3             | -6.51                           | 0.6                               | -7.11                                  | -0.38                            | -0.38                                    |
| 1_4             | -6.51                           | 0.6                               | -7.1                                   | -0.41                            | -0.41                                    |
| 2_1             | -6.19                           | 0.6                               | -6.79                                  | -0.51                            | -0.51                                    |
| 3_1             | -5.71                           | 0.6                               | -6.3                                   | -0.45                            | -0.45                                    |
| 4_1             | -5.68                           | 0.6                               | -6.27                                  | -0.41                            | -0.41                                    |
| 5_1             | -5.63                           | 0.6                               | -6.22                                  | -0.38                            | -0.38                                    |
| 6_1             | -5.29                           | 0.6                               | -5.88                                  | -0.52                            | -0.52                                    |
| 7_1             | -5.23                           | 0.6                               | -5.83                                  | -0.52                            | -0.52                                    |

Table S5. The autodocking data between SZI-1 and A $\beta$ <sub>1-42</sub> aggregates model.

| Rank<br>SunRank | Binding<br>Energy<br>[kcal/mol] | Torsional<br>Energy<br>[kcal/mol] | Intermolecular<br>Energy<br>[kcal/mol] | Internal<br>Energy<br>[kcal/mol] | Unbound<br>Extended Energy<br>[kcal/mol] |
|-----------------|---------------------------------|-----------------------------------|----------------------------------------|----------------------------------|------------------------------------------|
| 1_1             | -6.72                           | 0.89                              | -7.61                                  | -0.48                            | -0.48                                    |
| 1_2             | -6.57                           | 0.89                              | -7.47                                  | -0.47                            | -0.47                                    |
| 1_3             | -6.57                           | 0.89                              | -7.47                                  | -0.48                            | -0.48                                    |
| 1_4             | -6.56                           | 0.89                              | -7.45                                  | -0.49                            | -0.49                                    |
| 1_5             | -6.54                           | 0.89                              | -7.44                                  | -0.49                            | -0.49                                    |
| 1_6             | -6.43                           | 0.89                              | -7.32                                  | -0.47                            | -0.47                                    |
| 1_7             | -6.34                           | 0.89                              | -7.24                                  | -0.48                            | -0.48                                    |
| 1_8             | -6.32                           | 0.89                              | -7.21                                  | -0.28                            | -0.28                                    |
| 1_9             | -6.28                           | 0.89                              | -7.18                                  | -0.48                            | -0.48                                    |
| 1_10            | -6.04                           | 0.89                              | -6.94                                  | -0.48                            | -0.48                                    |

Table S6. The autodocking data between SZI-2 and A $\beta$ <sub>1-42</sub> aggregates model.

| Rank<br>SunRank | Binding<br>Energy<br>[kcal/mol] | Torsional<br>Energy<br>[kcal/mol] | Intermolecular<br>Energy<br>[kcal/mol] | Internal<br>Energy<br>[kcal/mol] | Unbound<br>Extended Energy<br>[kcal/mol] |
|-----------------|---------------------------------|-----------------------------------|----------------------------------------|----------------------------------|------------------------------------------|
| 1_1             | -7.37                           | 1.19                              | -8.56                                  | -0.61                            | -0.61                                    |
| 1_2             | -7.31                           | 1.19                              | -8.5                                   | -0.6                             | -0.6                                     |
| 1_3             | -7.17                           | 1.19                              | -8.36                                  | -0.51                            | -0.51                                    |
| 1_4             | -7.1                            | 1.19                              | -8.29                                  | -0.61                            | -0.61                                    |
| 1_5             | -7.09                           | 1.19                              | -8.29                                  | -0.61                            | -0.61                                    |
| 1_6             | -7.05                           | 1.19                              | -8.25                                  | -0.55                            | -0.55                                    |
| 1_7             | -7.04                           | 1.19                              | -8.23                                  | -0.55                            | -0.55                                    |
| 1_8             | -6.98                           | 1.19                              | -8.17                                  | -0.55                            | -0.55                                    |
| 1_9             | -6.98                           | 1.19                              | -8.17                                  | -0.62                            | -0.62                                    |
| 1_10            | -6.94                           | 1.19                              | -8.14                                  | -0.62                            | -0.62                                    |

Table S7. The autodocking data between SZI-3 and A $\beta_{1-42}$  aggregates model.

| Rank<br>SunRank | Binding<br>Energy<br>[kcal/mol] | Torsional<br>Energy<br>[kcal/mol] | Intermolecular<br>Energy<br>[kcal/mol] | Internal<br>Energy<br>[kcal/mol] | Unbound<br>Extended Energy<br>[kcal/mol] |
|-----------------|---------------------------------|-----------------------------------|----------------------------------------|----------------------------------|------------------------------------------|
| 1_1             | -8.27                           | 1.49                              | -9.77                                  | -0.8                             | -0.8                                     |
| 1_2             | -8.12                           | 1.49                              | -9.61                                  | -0.81                            | -0.81                                    |
| 1_3             | -8.03                           | 1.49                              | -9.52                                  | -0.81                            | -0.81                                    |
| 2_1             | -8.04                           | 1.49                              | -9.53                                  | -0.78                            | -0.78                                    |
| 3_1             | -8.04                           | 1.49                              | -9.53                                  | -0.8                             | -0.8                                     |
| 4_1             | -7.87                           | 1.49                              | -9.36                                  | -0.79                            | -0.79                                    |
| 5_1             | -7.56                           | 1.49                              | -9.06                                  | -0.79                            | -0.79                                    |
| 6_1             | -7.46                           | 1.49                              | -8.95                                  | -0.8                             | -0.8                                     |
| 7_1             | -6.86                           | 1.49                              | -8.35                                  | -0.82                            | -0.82                                    |
| 8_1             | -6.73                           | 1.49                              | -8.22                                  | -0.81                            | -0.81                                    |

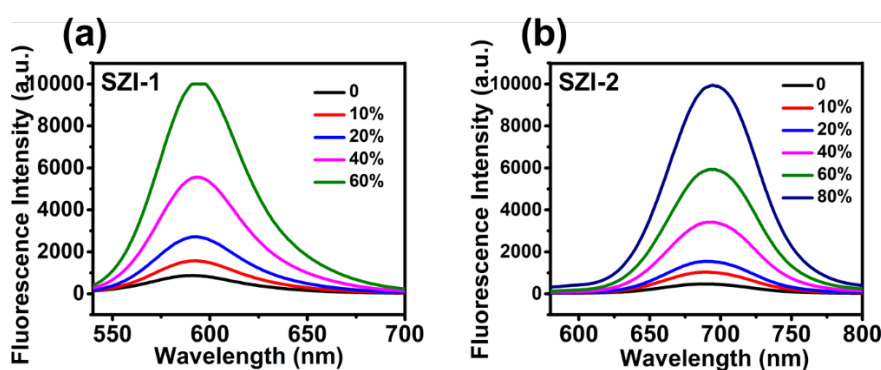

Figure S2. The viscosity response characteristics of SZIs. (a) SZI-1. (b) SZI-2. The solvent was different ratios of 1,2-propanediol and water (v/v).

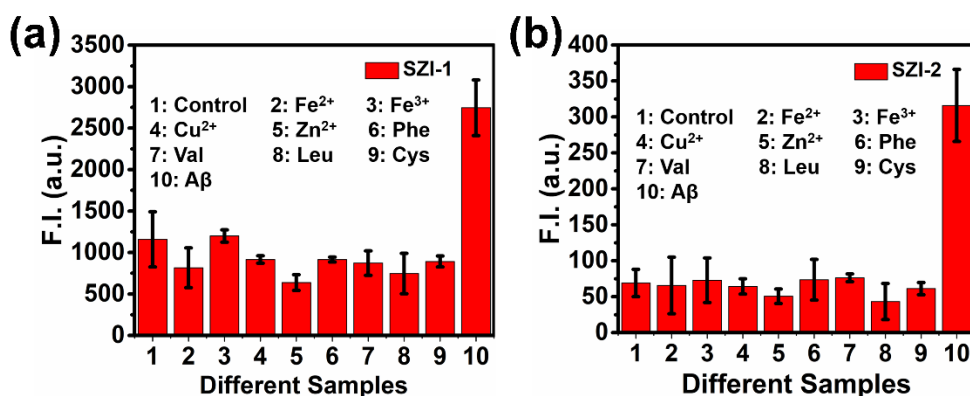

Figure S3. The selectivity of (a) SZI-1 (0.2  $\mu$ g), (b) SZI-2 (0.2  $\mu$ g) to different ions (20  $\mu$ M), amino acid (20  $\mu$ M) and A $\beta_{1-42}$  aggregates (20  $\mu$ M). All the samples were tested in triplicate.

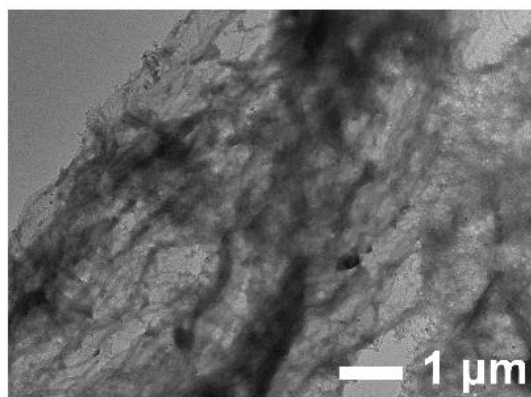

Figure S4. TEMs of A $\beta$ <sub>1-42</sub> aggregates.

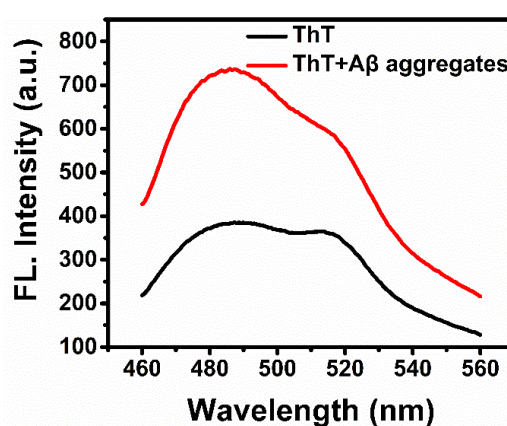

Figure S5. The fluorescence response of ThT to A $\beta$ <sub>1-42</sub> aggregates.

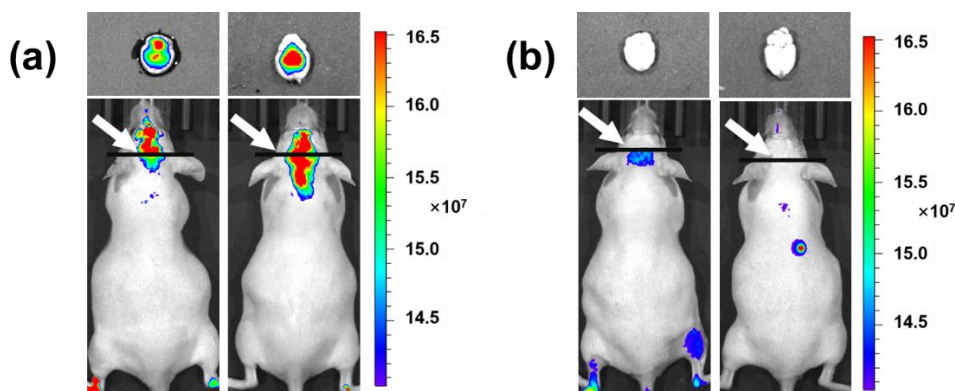

Figure S6. *In vivo* BBB penetration test. (a) The BBB penetration test using MSN-Lf@SZI-1 (left, 2 mg/kg in 50 % 1,2-propanediol and 50 % PBS) and MSN-Lf@SZI-2 (right, 2 mg/kg in 50 % 1,2-propanediol and 50 % PBS) in KM mice. (b) The BBB penetration test using SZI-1 (left, 2 mg/kg in 50 % 1,2-propanediol and 50 % PBS) and SZI-2 (right, 2 mg/kg in 50 % 1,2-propanediol and 50 % PBS) in KM mice. To be more intuitive, we also performed fluorescence imaging on the dissected mouse brain (the small images above in a and b)



Table S8. Comparison of our probes with reported probes.

| Probe        | Molecule structure | Kd                                       | Target Analyte            | Reference  |
|--------------|--------------------|------------------------------------------|---------------------------|------------|
| 1 ANCA       |                    | 1.4±0.2<br>~<br>13.8±3.1 μM              | Aβ fibrils                | (1)        |
| 2 ThT        |                    | 890 nM                                   | Aβ fibrils                | (2)<br>(3) |
| 3 NMM        |                    | >2 μM                                    | Aβ fibrils                | (4)        |
| 4 AN-SP      |                    | 1.7 μM                                   | Aβ oligomer               | (5)        |
| 5 F-SLOH     |                    | 1.90 μM<br>0.66 μM                       | Aβ fibrils<br>Aβ oligomer | (6)        |
| 6 ARCAM<br>1 |                    | 870±280 nM                               | Aβ fibrils                | (7)        |
| 7 4c<br>4d   |                    | 4c, 0.79 ± 0.05 μM<br>4d, 0.90 ± 0.02 μM | Aβ fibrils                | (8)        |
| 8 SZI-1      |                    | 507.6±94.75 nM                           | Aβ fibrils                | This work  |
| 9 SZI-2      |                    | 600.6±94.82 nM                           | Aβ fibrils                | This work  |

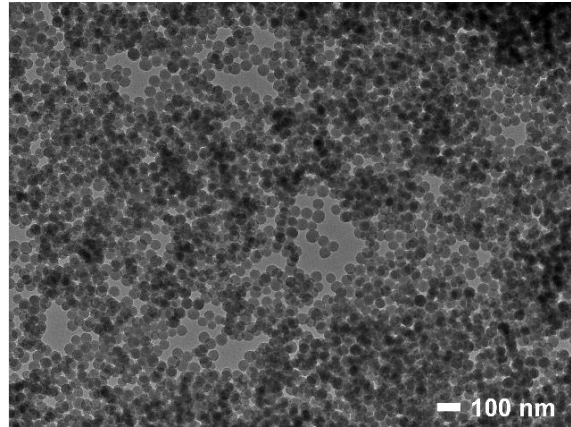

Figure S7. The wide range TEM of MSN-NH<sub>2</sub>. Scale bar is 100 nm.

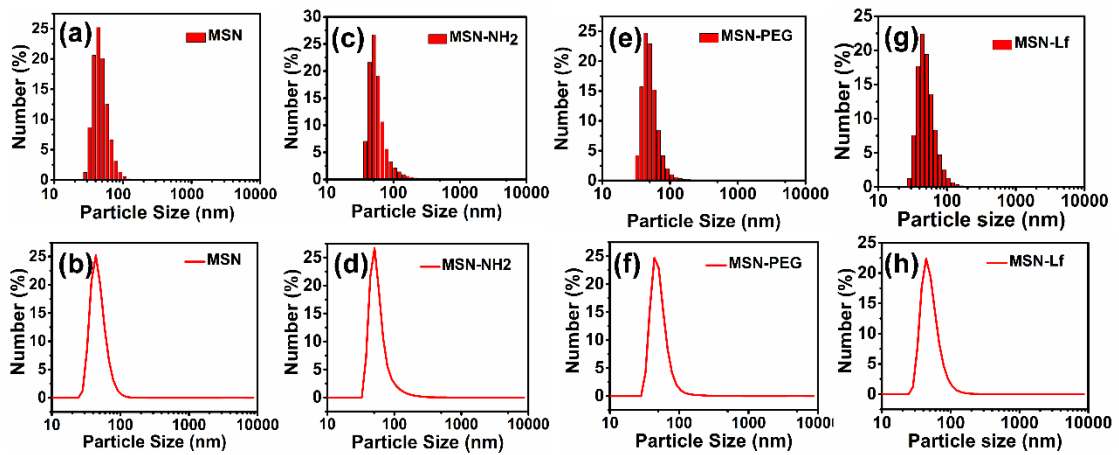

Figure S8. The particle size distribution of different MSN nanoparticles. (a, b) The particle size distribution of MSN. (c, d) The particle size distribution of MSN-NH<sub>2</sub>. (e, f) The particle size distribution of MSN-PEG. (g, h) The particle size distribution of MSN-Lf.

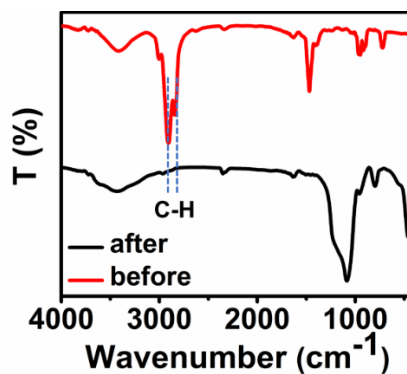

Figure S9. The FTIR image of before and after the removal of CTAC in MSN.

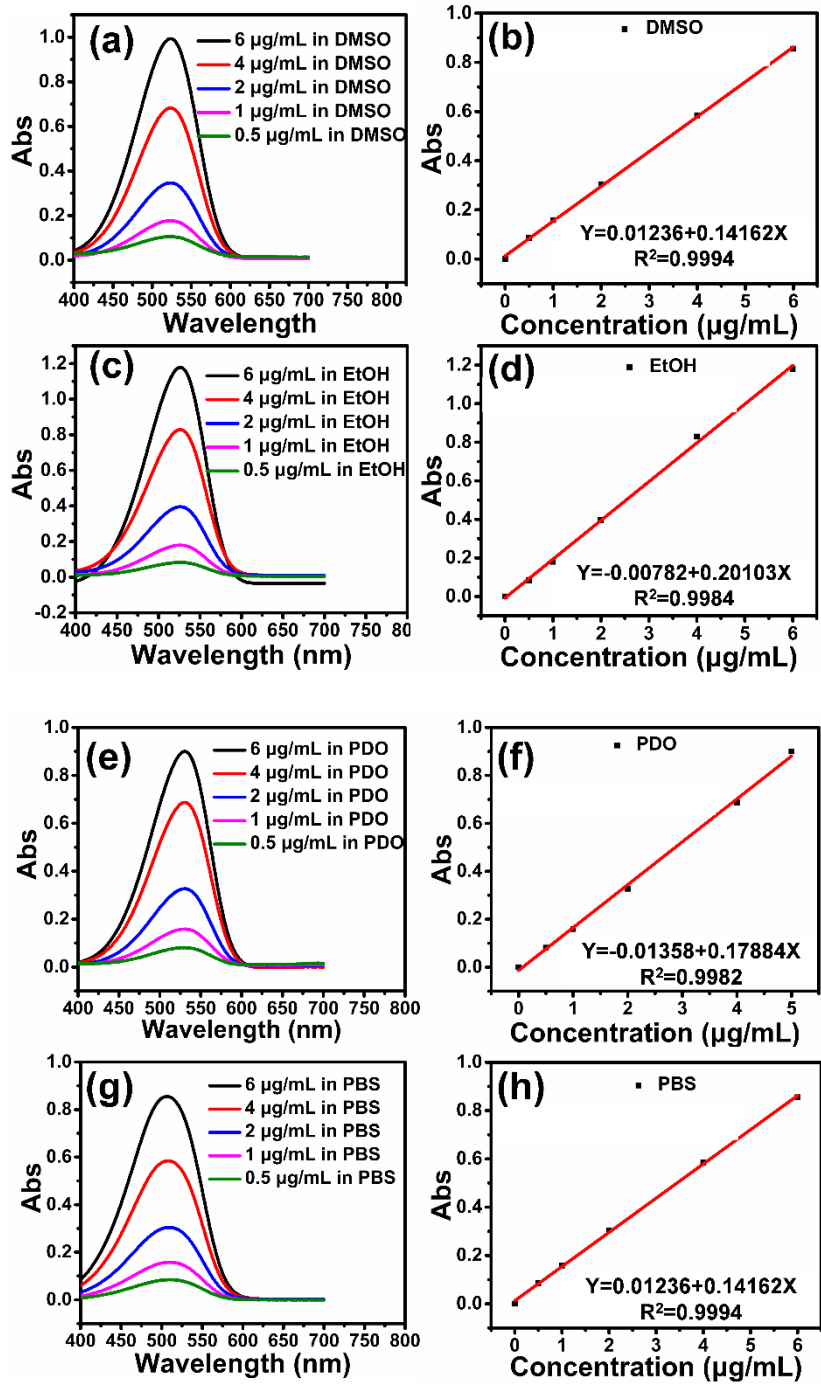

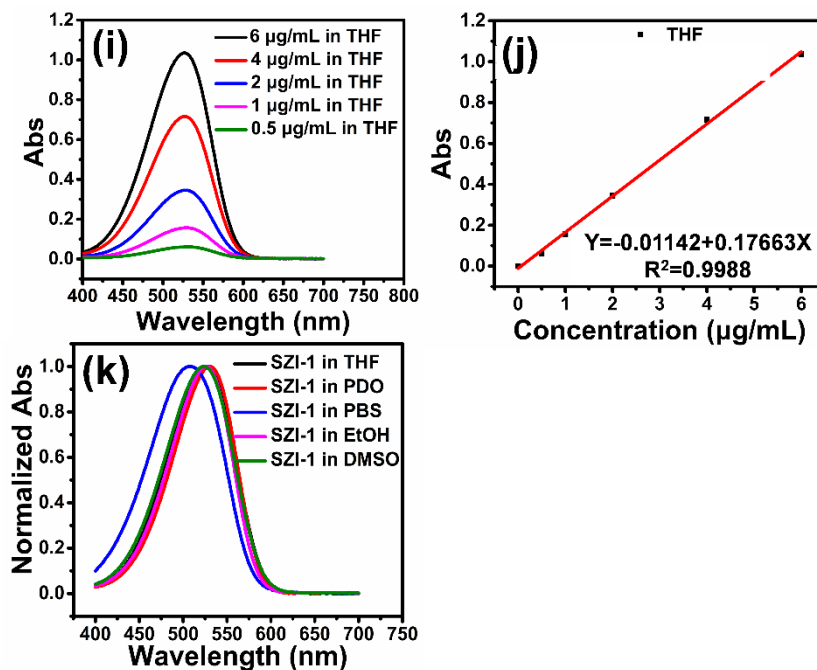

Figure S10. The absorption spectrum and corresponding standard curves of SZI-1 in different solvent. (a, b) DMSO, (c, d) EtOH, (e, f) PDO, (g, h) PBS, (i, j) THF. (k) Normalized Abs of SZI-1 in different solvent. The concentration has been given in the figure.

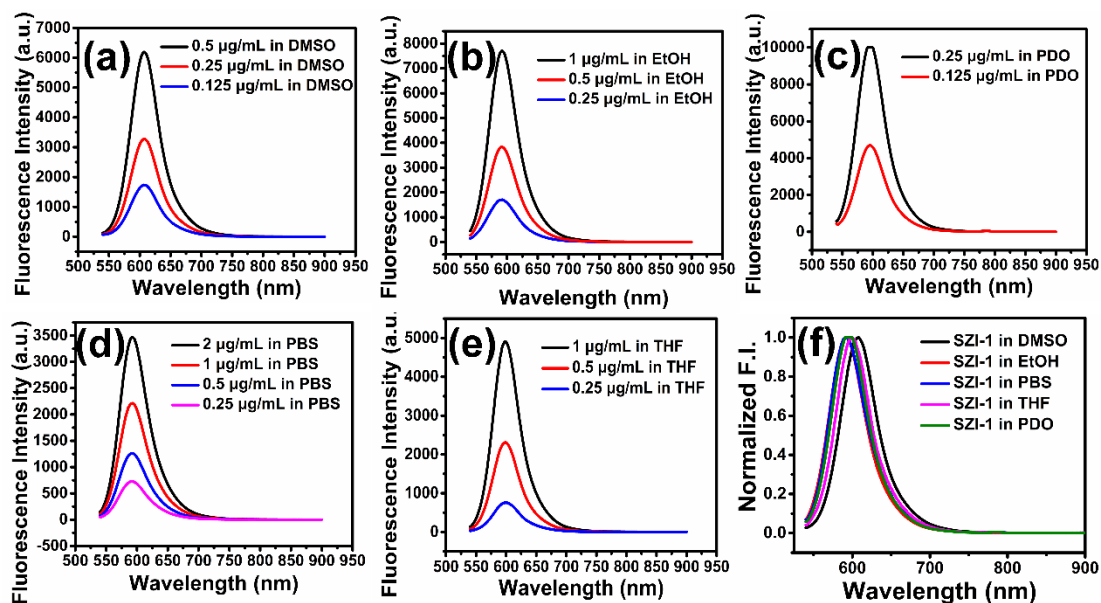

Figure S11. The fluorescence intensity of SZI-1 in different solvent. (a) DMSO, (b) EtOH, (c) PDO, (d) PBS (e) THF. (f) Normalized FL of SZI-1 in different solvent. The concentration has been given in the figure.

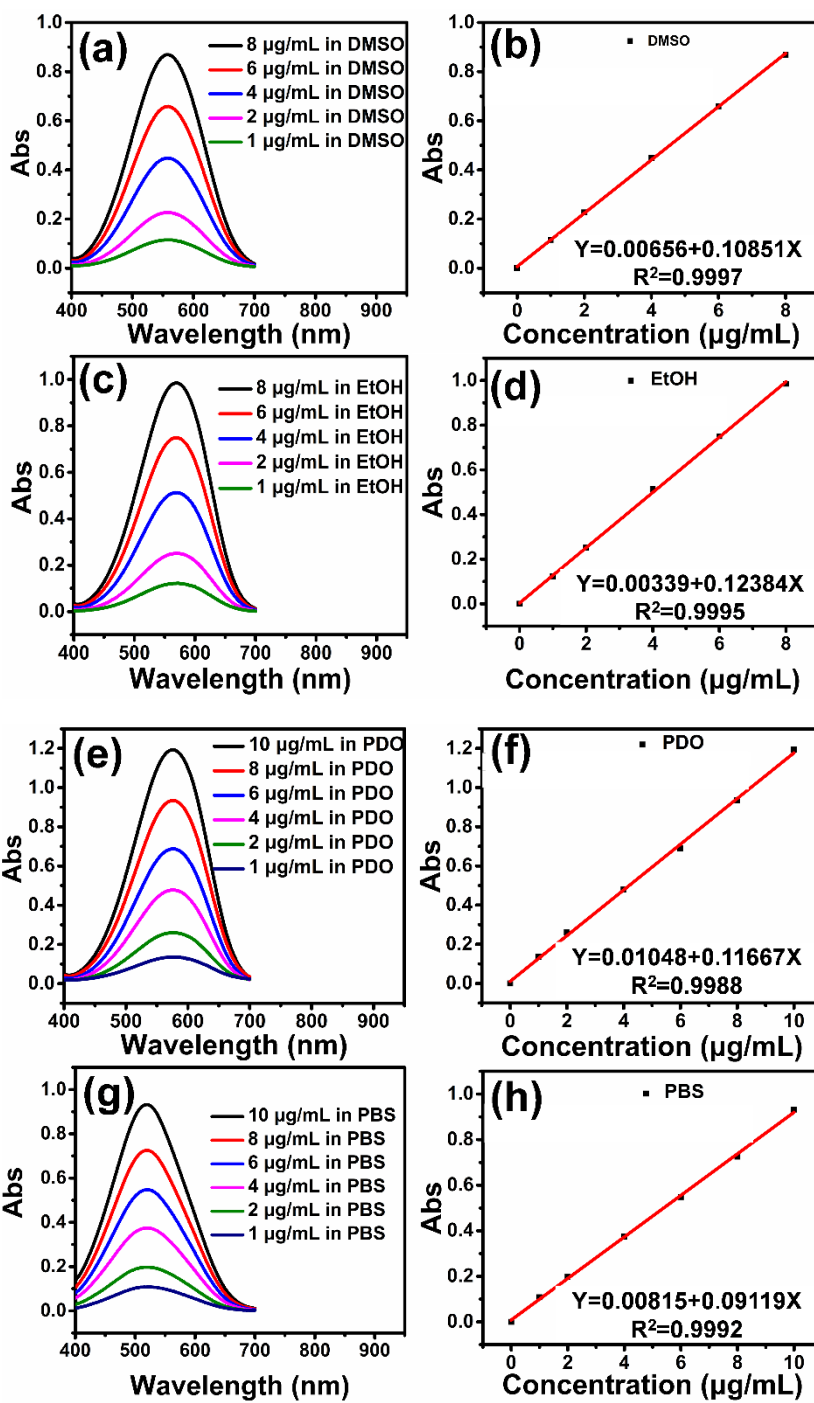

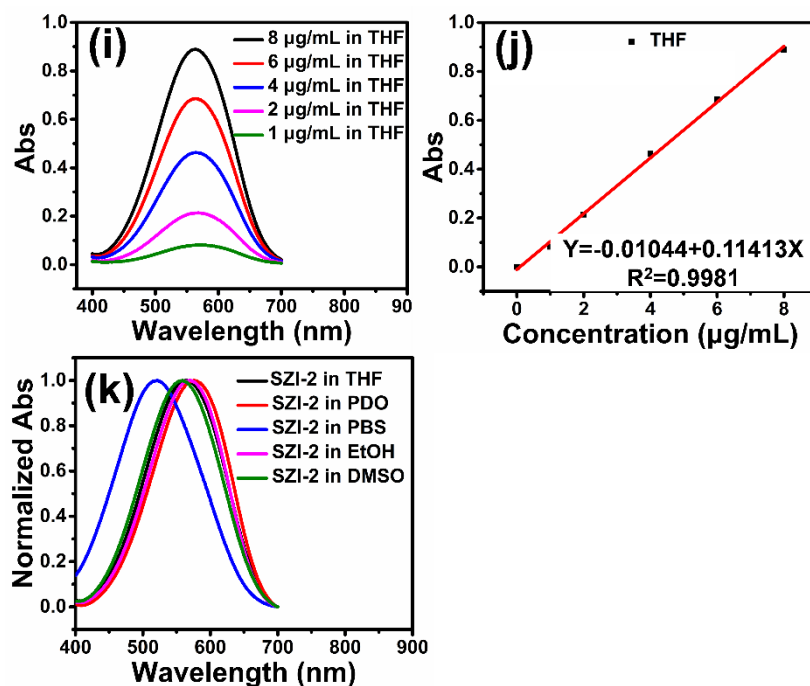

Figure S12. The absorption spectrum and corresponding standard curves of SZI-2 in different solvent. (a, b) DMSO, (c, d) EtOH, (e, f) PDO, (g, h) PBS, (i, j) THF. (k) Normalized Abs of SZI-2 in different solvent. The concentration has been given in the figure.

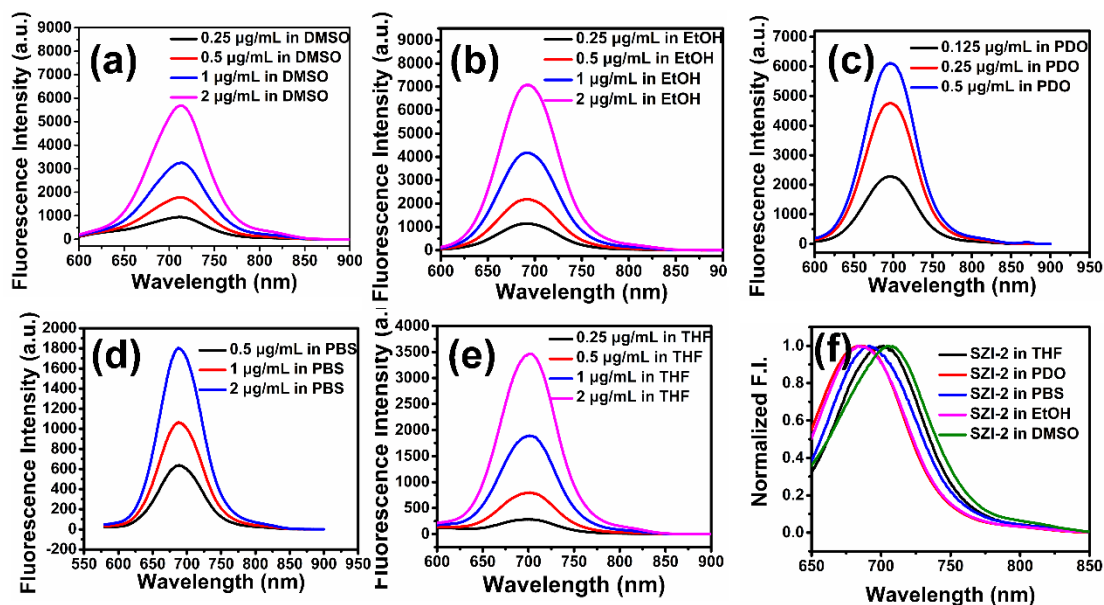

Figure S13. The fluorescence intensity of SZI-2 in different solvent. (a) DMSO, (b) EtOH, (c) PDO, (d) PBS, (e) THF. (f) Normalized FL of SZI-2 in different solvent. The concentration has been given in the figure.

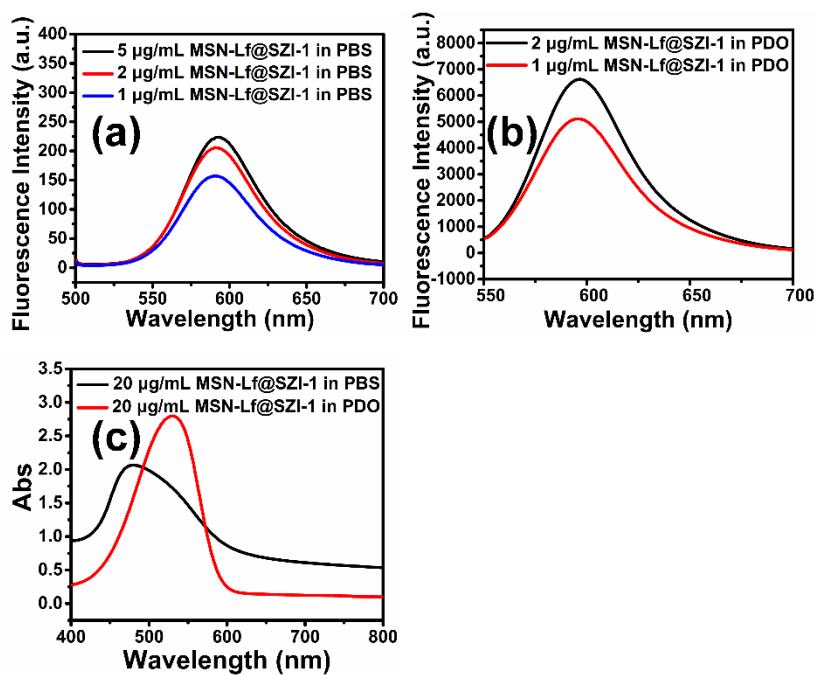

Figure S14. The fluorescence intensity of MSN-Lf@SZI-1 in (a) PBS and (b) PDO. (c) The Abs of MSN-Lf@SZI-1. The concentration has been given in the figure.

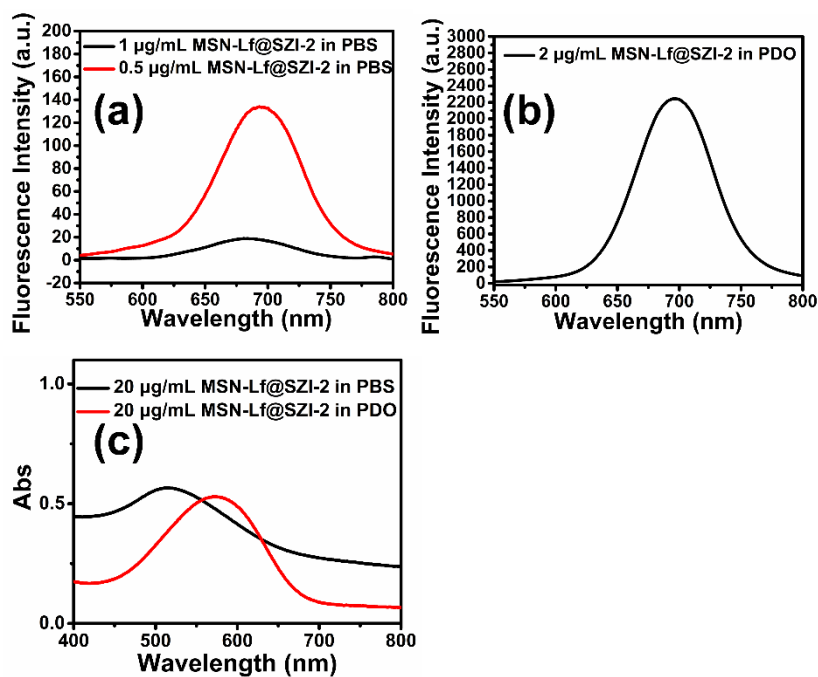

Figure S15. The fluorescence intensity of MSN-Lf@SZI-2 in (a) PBS and (b) PDO. (c) The Abs of MSN-Lf@SZI-2. The concentration has been given in the figure.

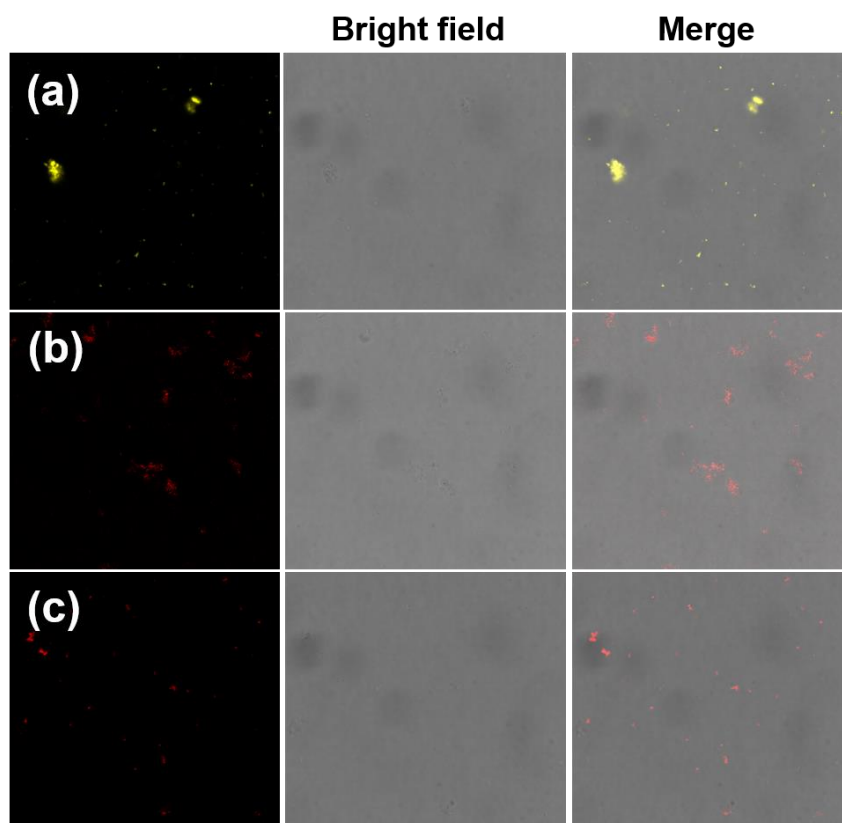

Figure S16. The confocal laser scanning microscope (CLSM) images of (a) MSN-Lf@SZI-1 (b) MSN-Lf@SZI-2 (c) MSN-Lf@SZI-3. The excitation wavelength ( $\lambda_{ex}$ ) were 488 nm (a), 552 nm (b, c), respectively.

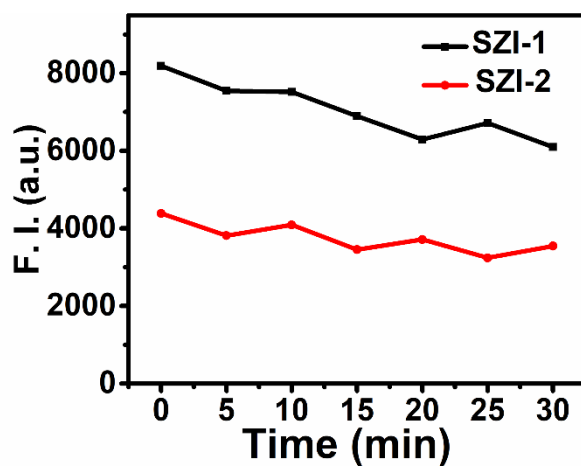

Figure S17. Photostability of SZI-1 and SZI-2 under continuous white light (15-16 mV) illumination.



Table S9. The conditions used for LC-MS analysis.

| Probe          | LC-MS analysis                       |                |               |             |
|----------------|--------------------------------------|----------------|---------------|-------------|
|                | Eluent                               | Retention Time | Analysis Time | UV detector |
|                | CH <sub>3</sub> CN: H <sub>2</sub> O | [min]          | [min]         | [nm]        |
| SZI-1          | 5:95 ~ 95:5                          | 12.165         | 32            | 254         |
| SZI-1 in brain | 5:95 ~ 95:5                          | 12.635         | 32            | 254         |
| SZI-2          | 5:95 ~ 95:5                          | 13.128         | 32            | 254         |
| SZI-2 in brain | 5:95 ~ 95:5                          | 12.967         | 32            | 254         |

Table S10. Uptake of SZI-1 and SZI-2 in the brains of KM mice.

| Probe | Concentration<br>[ $\mu\text{g} / \text{mL}$ ] <sup>a</sup> | Intravenous<br>Injection<br>Volume<br>[ $\mu\text{L}$ ] | LC-MS<br>injection<br>volume<br>[ $\mu\text{L}$ ] | Peak<br>Area <sup>c</sup> | The quality of<br>the probe in<br>the brain<br>[ $\mu\text{g}$ ] | Wet<br>weight of<br>brain<br>[g] | Uptake<br>[% ID/g] | Mean Uptake<br>[% ID/g] <sup>b</sup> |
|-------|-------------------------------------------------------------|---------------------------------------------------------|---------------------------------------------------|---------------------------|------------------------------------------------------------------|----------------------------------|--------------------|--------------------------------------|
| SZI-1 | 47.5                                                        | 125                                                     | 50                                                | 30.82                     | 0.64                                                             | 0.42                             | 25.47              | 15.73 $\pm$ 8.51                     |
| SZI-1 | 47.5                                                        | 125                                                     | 50                                                | 20.66                     | 0.30                                                             | 0.42                             | 11.99              |                                      |
| SZI-1 | 47.5                                                        | 125                                                     | 50                                                | 18.96                     | 0.24                                                             | 0.42                             | 9.73               |                                      |
| SZI-2 | 40                                                          | 125                                                     | 50                                                | 21.86                     | 0.19                                                             | 0.42                             | 7.47               | 7.09 $\pm$ 0.79                      |
| SZI-2 | 40                                                          | 125                                                     | 50                                                | 8.31                      | 0.13                                                             | 0.42                             | 6.19               |                                      |
| SZI-2 | 40                                                          | 125                                                     | 50                                                | 15.12                     | 0.16                                                             | 0.42                             | 7.62               |                                      |

a) The concentration actually refers to the concentration of the probe in MSN-Lf@SZIs, which was qualified by a UV-visible spectrophotometer according to standard curve.

b) % ID/g means % injection dose per gram of brain wet weight.

c) The peak area was determined by Origin 8.0 software.

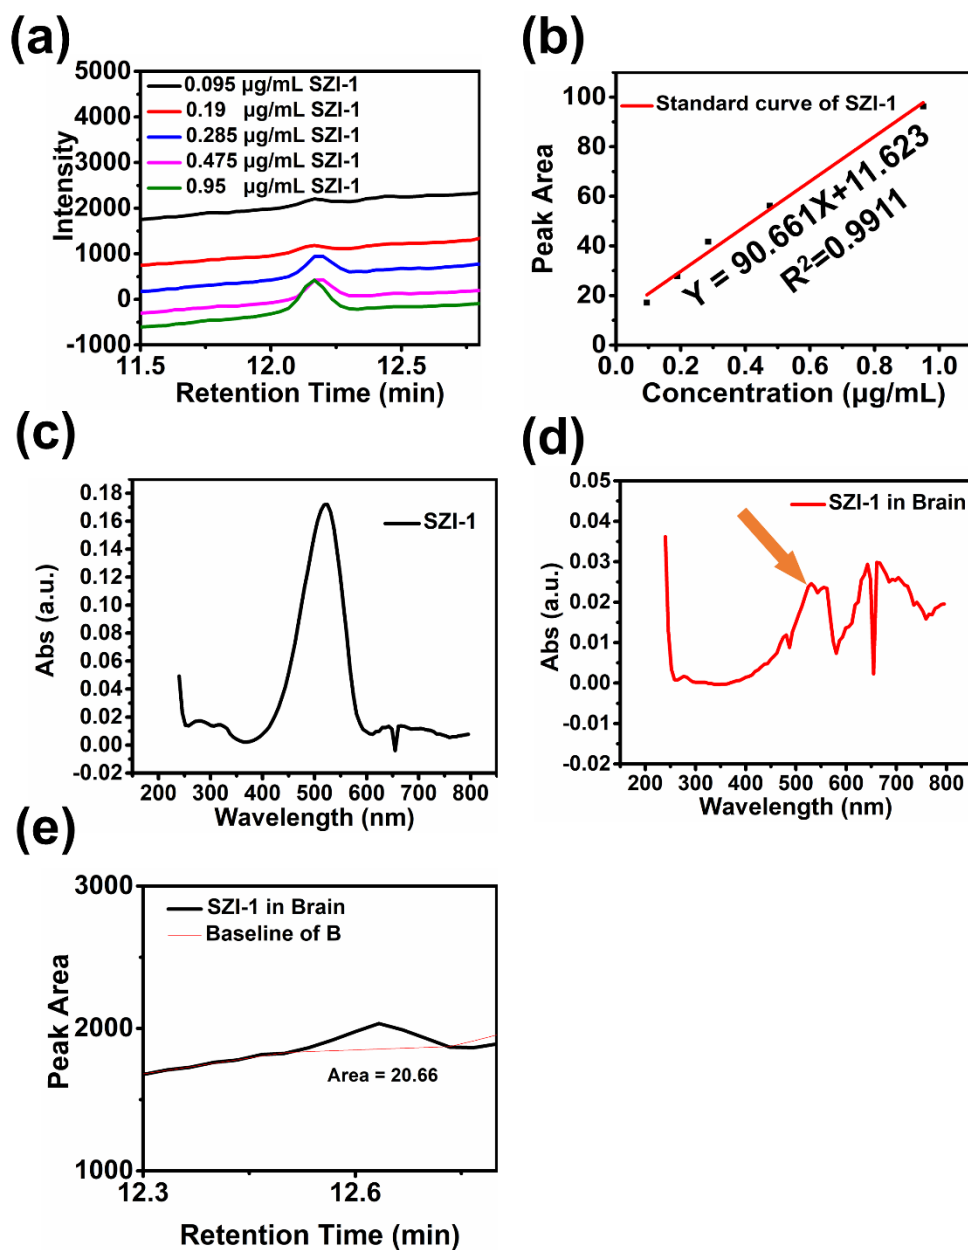

Figure S18. The representative LC-MS data of SZI-1. (a) The LC-MS chromatogram curve of SZI-1. (b) The standard curve of SZI-1. (c) The UV-Vis spectrometry of SZI-1 detected by LC-MS. (d) The UV-Vis spectrometry of SZI-1 in brain detected by LC-MS. (e) The representative peak area of SZI-1 in brain. The retention time was determined by mass spectrometry data of SZI-1 detected by LC-MS. The mass spectrometry data (ESI-MS) was given in Figure S20.

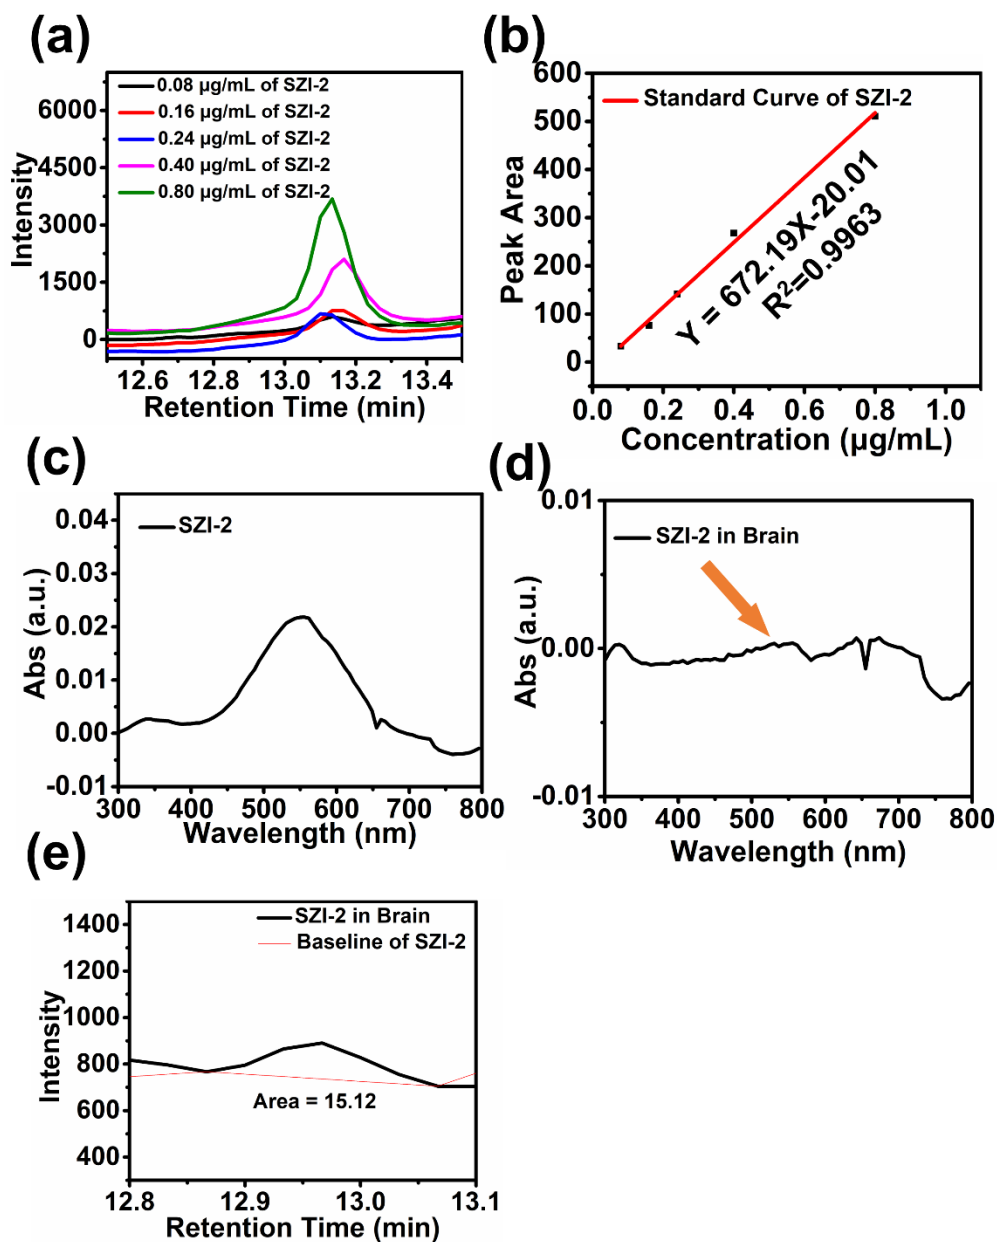

Figure S19. The representative LC-MS data of SZI-2. (a) The LC-MS chromatogram curve of SZI-2. (b) The standard curve of SZI-2. (c) The UV-Vis spectrometry of SZI-2 detected by LC-MS. (d) The UV-Vis spectrometry of SZI-2 in brain detected by LC-MS. (e) The representative peak area of SZI-2 in brain. The retention time was determined by mass spectrometry data of SZI-2 detected by LC-MS. The mass spectrometry data (ESI-MS) was given in Figure S20.

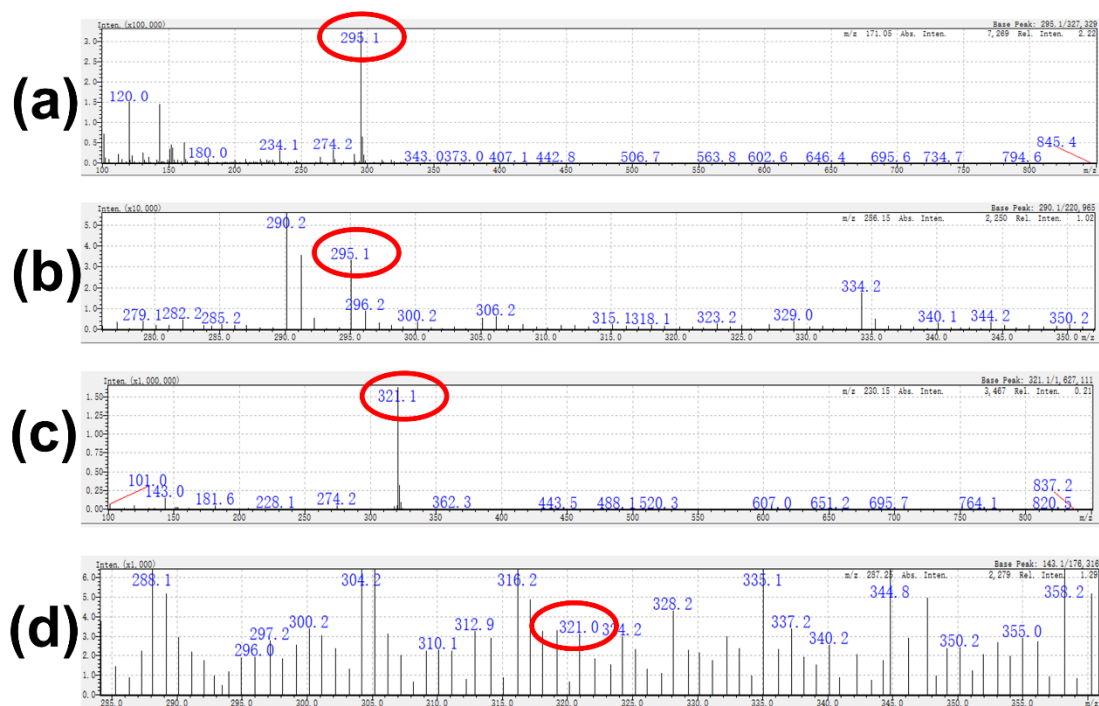

Figure S20. The representative mass spectrometry data of SZIs and SZIs in brain. (a) The mass spectrometry data of SZI-1. (b) The mass spectrometry data of SZI-1 in brain. (c) The mass spectrometry data of SZI-2. (d) The mass spectrometry data of SZI-2 in brain.

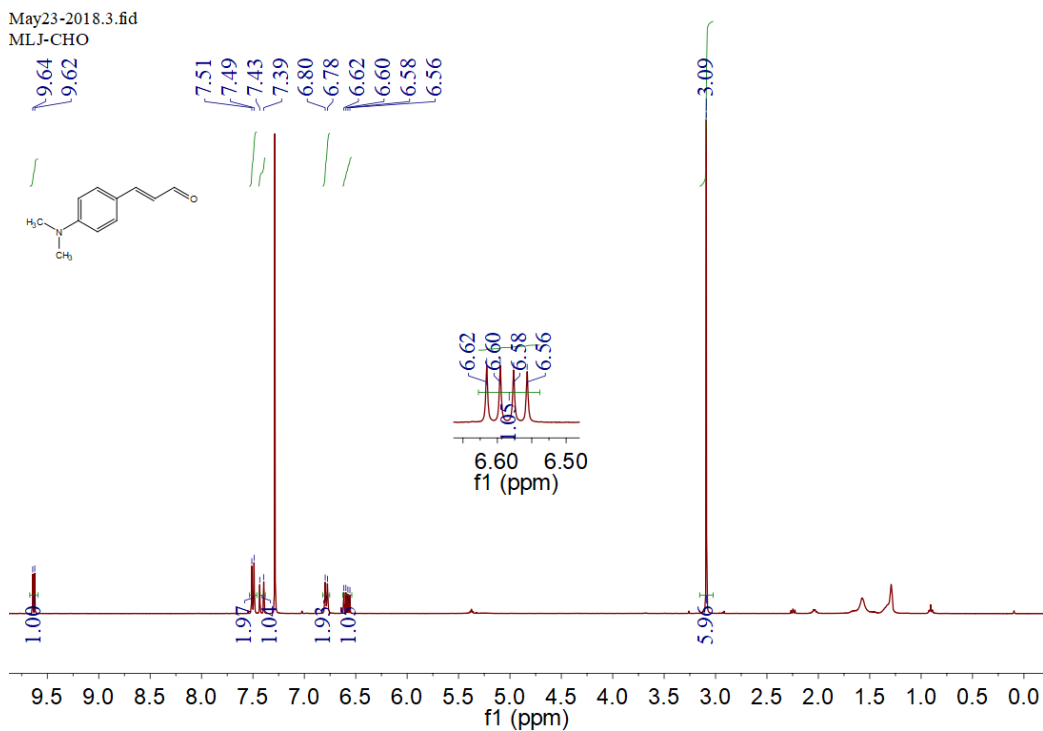

Figure S21. The  $^1\text{H}$  NMR of compound 1.

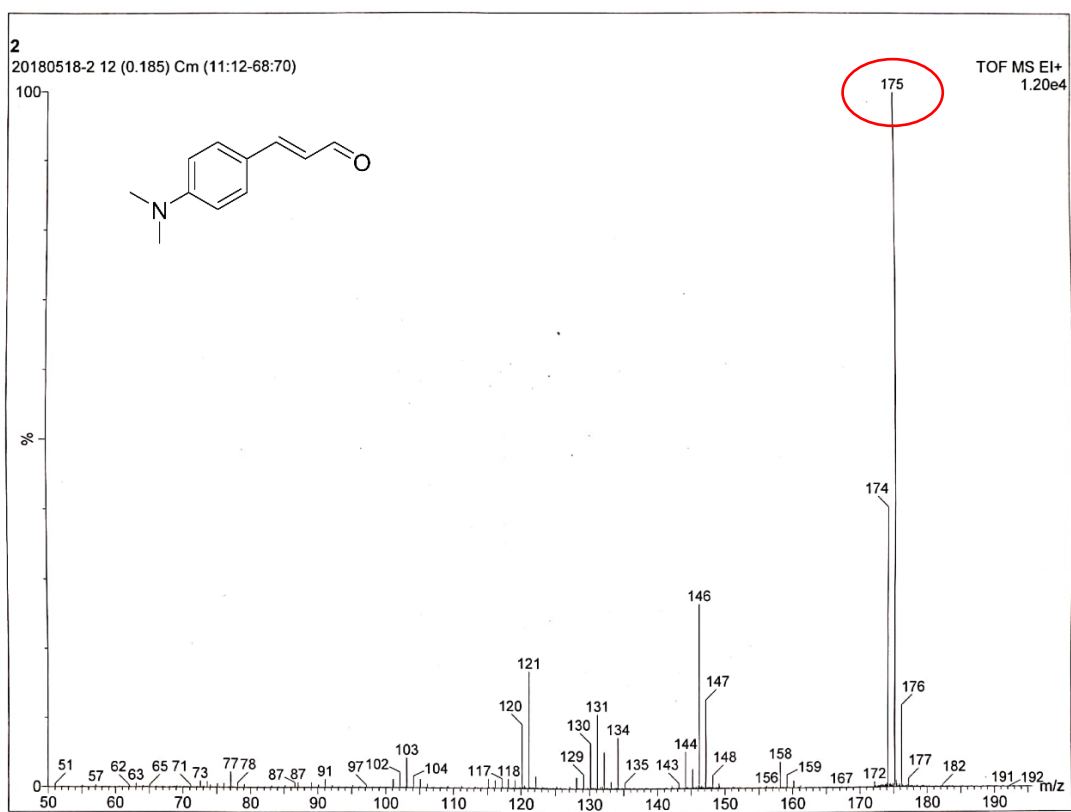

Figure S22. The mass Spectra (EI) of compound 1.

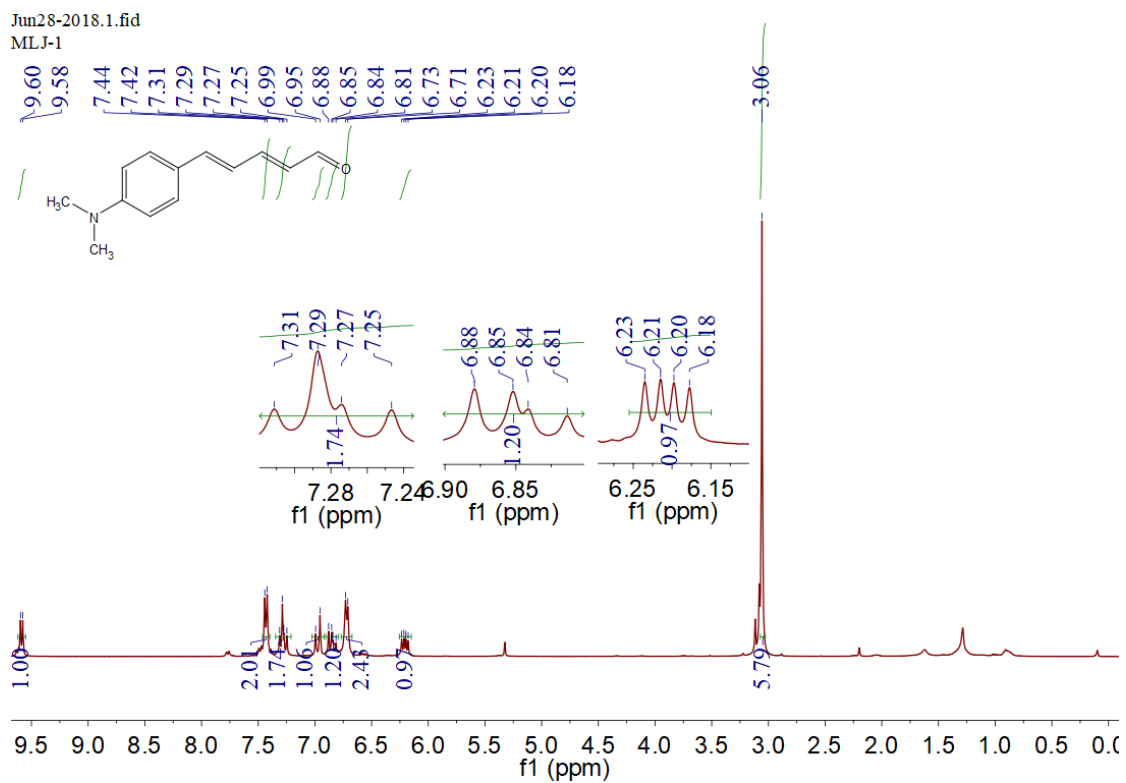

Figure S23. The  $^1\text{H}$  NMR of compound 2.

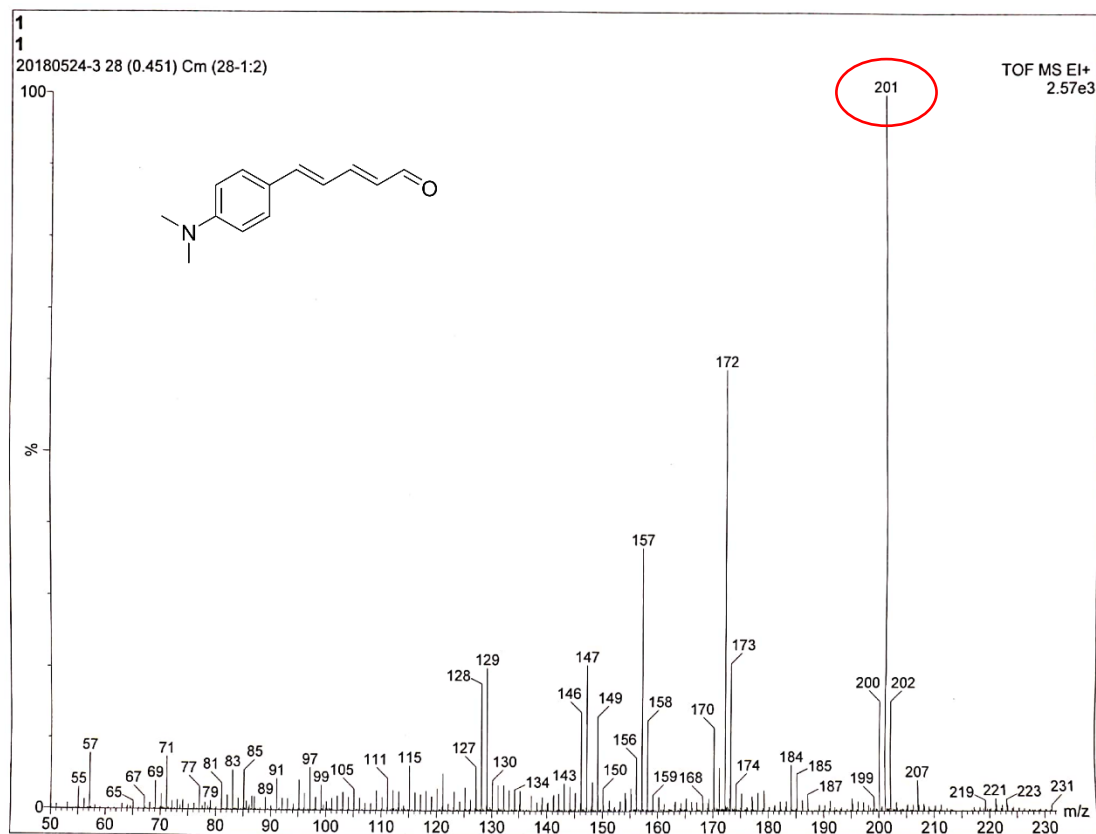

Figure S24. The mass Spectra (EI) of compound 2.

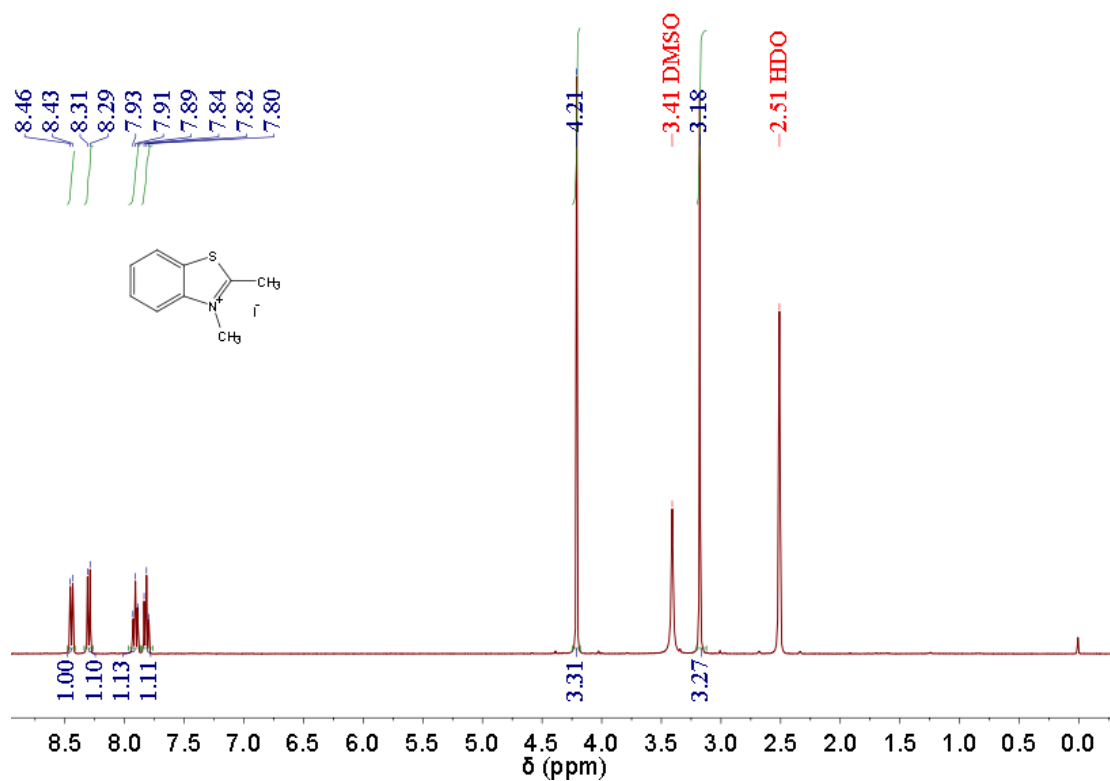

Figure S25. The  $^1\text{H}$  NMR of compound 3.

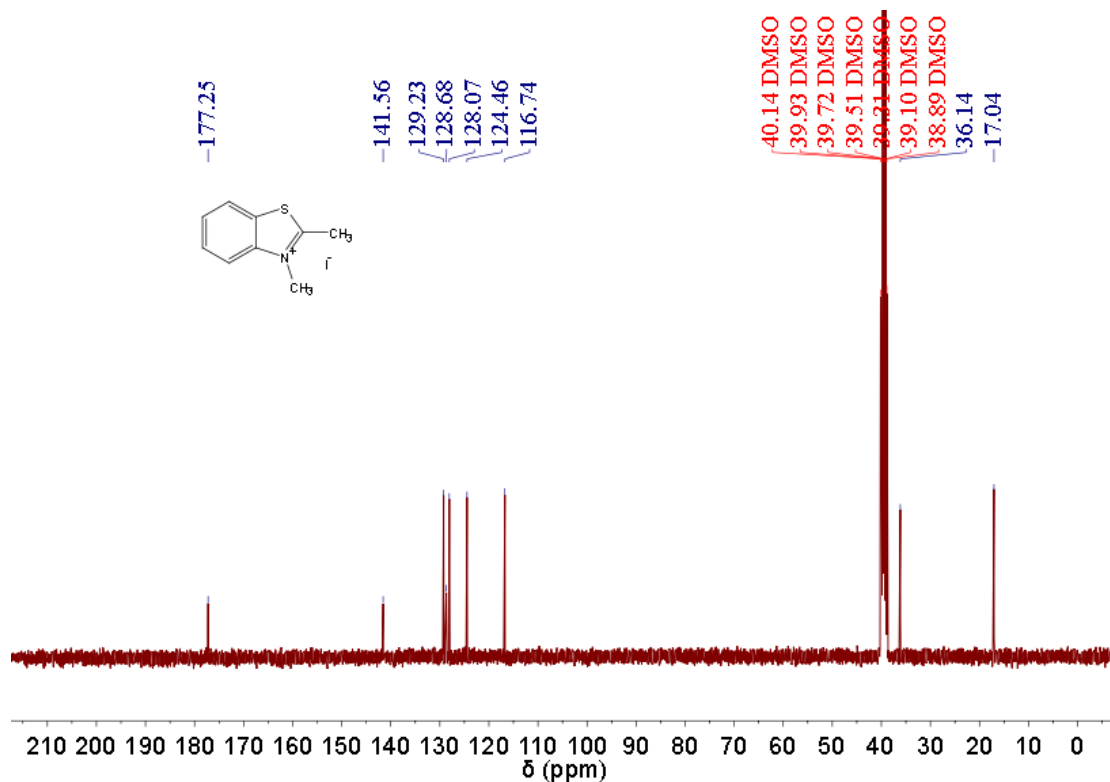

Figure S26. The  $^{13}\text{C}$  NMR of compound 3.

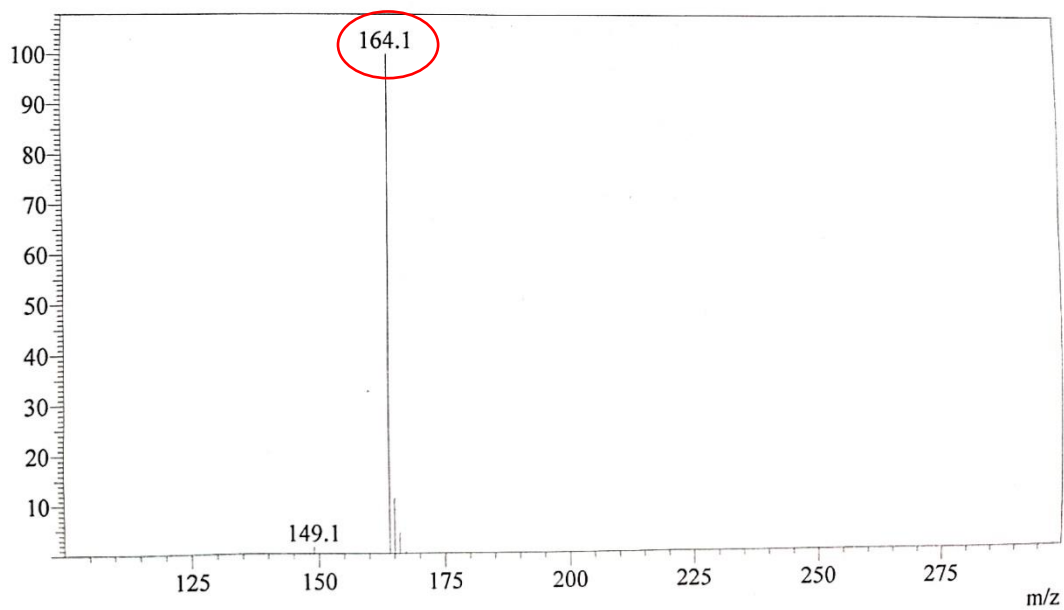

Figure S27. The mass Spectra (EI) of compound 3.

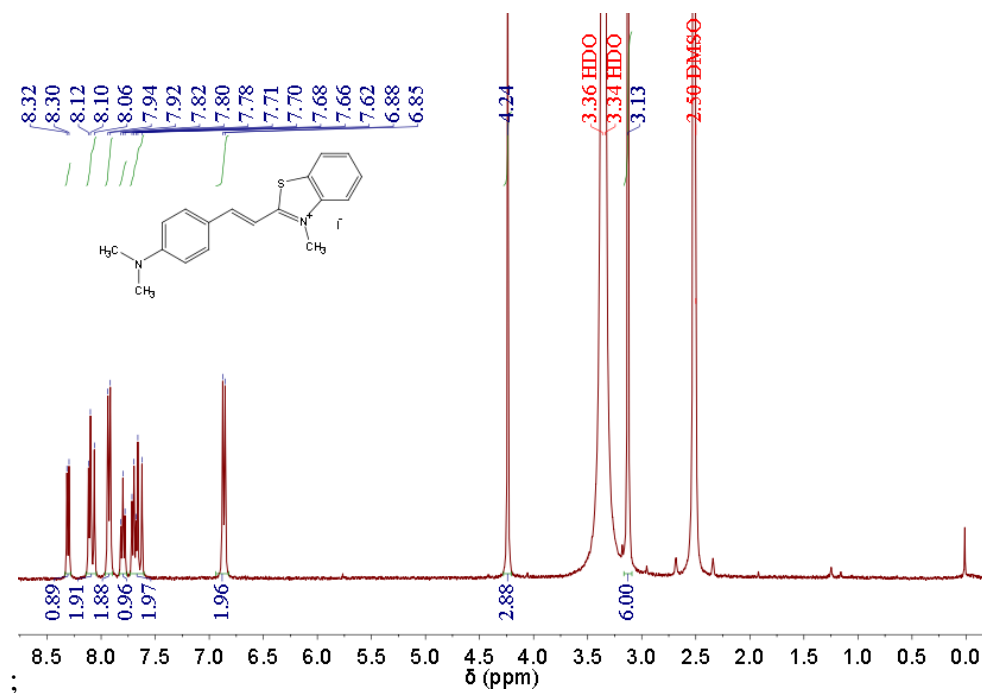

Figure S28. The <sup>1</sup>H NMR of compound SZI-1.



| Acquisition Parameter |           |                     |           |
|-----------------------|-----------|---------------------|-----------|
| Acquisition Mode      | Single MS | Acquired Scans      | 4         |
| Polarity              | Positive  | Broadband High Mass | 500.0 m/z |
| Broadband Low Mass    | 57.7 m/z  |                     |           |

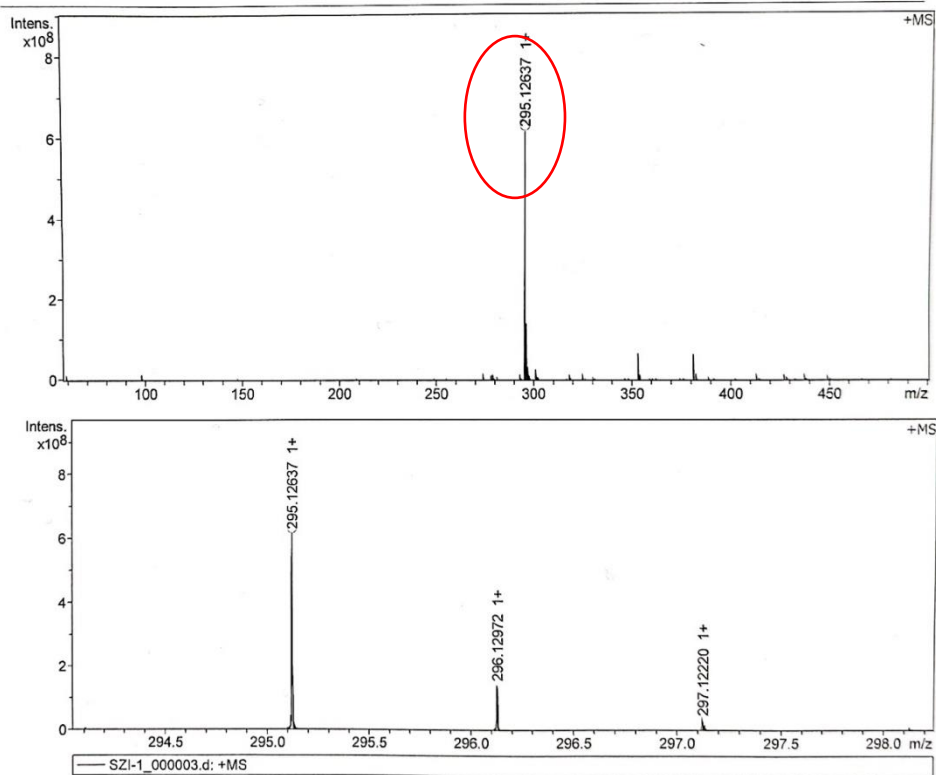

| Meas. m/z  | # | Ion Formula                                      | Score  | m/z        | err [ppm] | Mean err [ppm] | mSigma | rdb  | e <sup>-</sup> Conf | N-Rule |
|------------|---|--------------------------------------------------|--------|------------|-----------|----------------|--------|------|---------------------|--------|
| 295.126366 | 1 | C <sub>18</sub> H <sub>19</sub> N <sub>2</sub> S | 100.00 | 295.126346 | -0.1      | -0.2           | 34.2   | 10.5 | even                | ok     |

Figure S29. Mass Spectra (ESI) of SZI-1

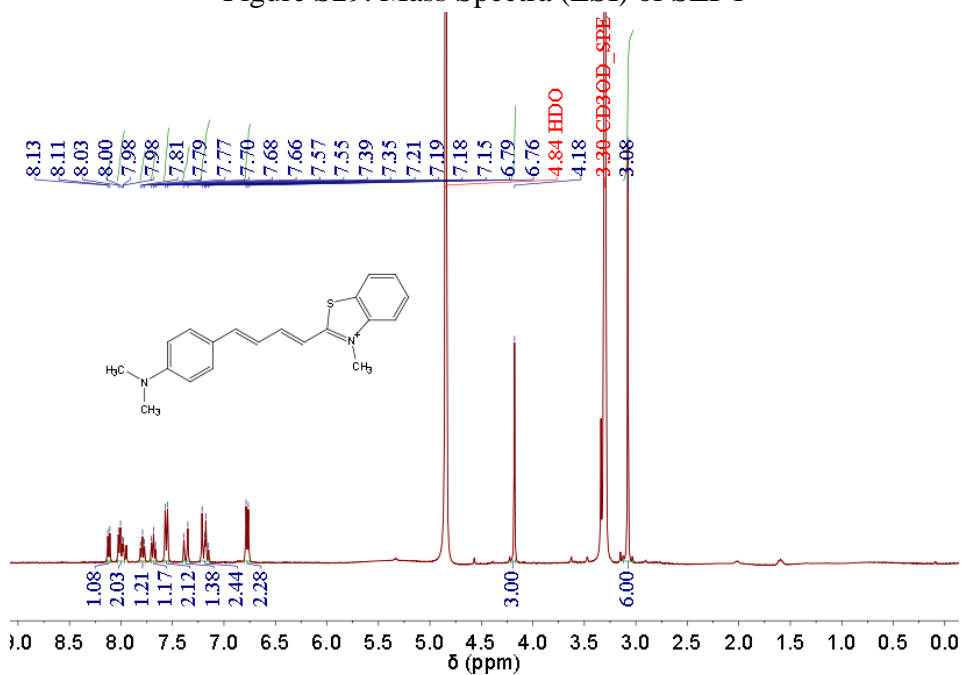

Figure S30. The <sup>1</sup>H NMR of compound SZI-2.

| Acquisition Parameter |           |                       |           |
|-----------------------|-----------|-----------------------|-----------|
| Acquisition Mode      | Single MS | Acquired Scans        | 20        |
| Polarity              | Positive  | Source Accumulation   | 0.001 sec |
| Broadband High Mass   | 500.0 m/z | Ion Accumulation Time | 0.050 sec |

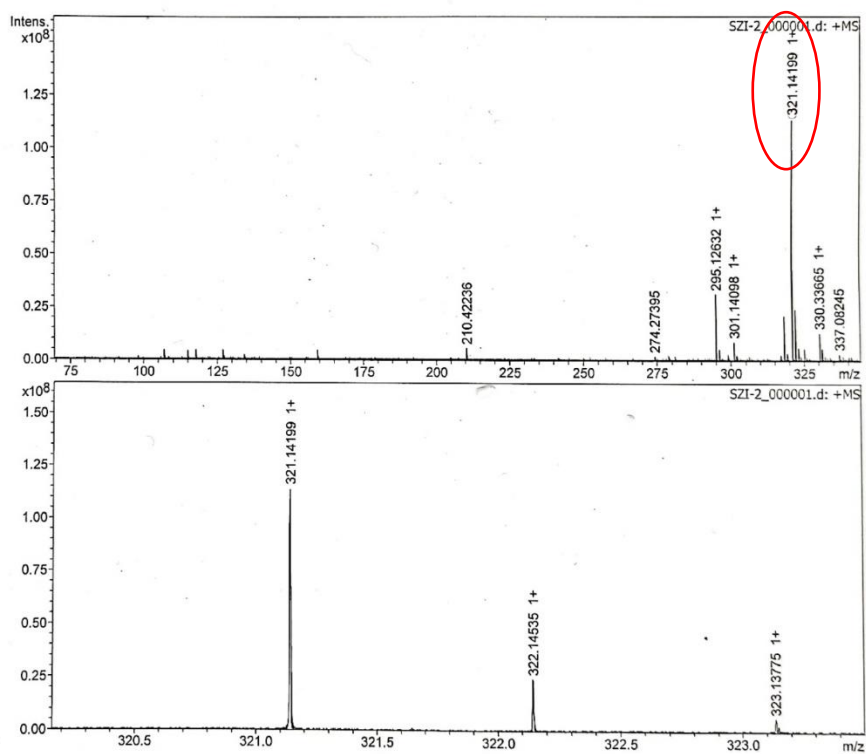

| Meas. m/z  | # | Ion Formula | Score  | m/z        | err [ppm] | Mean err [ppm] | mSigma | rdb  | e <sup>-</sup> Conf | N-Rule |
|------------|---|-------------|--------|------------|-----------|----------------|--------|------|---------------------|--------|
| 321.141991 | 1 | C20H21N2S   | 100.00 | 321.141996 | -0.0      | -0.1           | 36.7   | 11.5 | even                | ok     |

Figure S31. Mass Spectra (ESI) of SZI-2

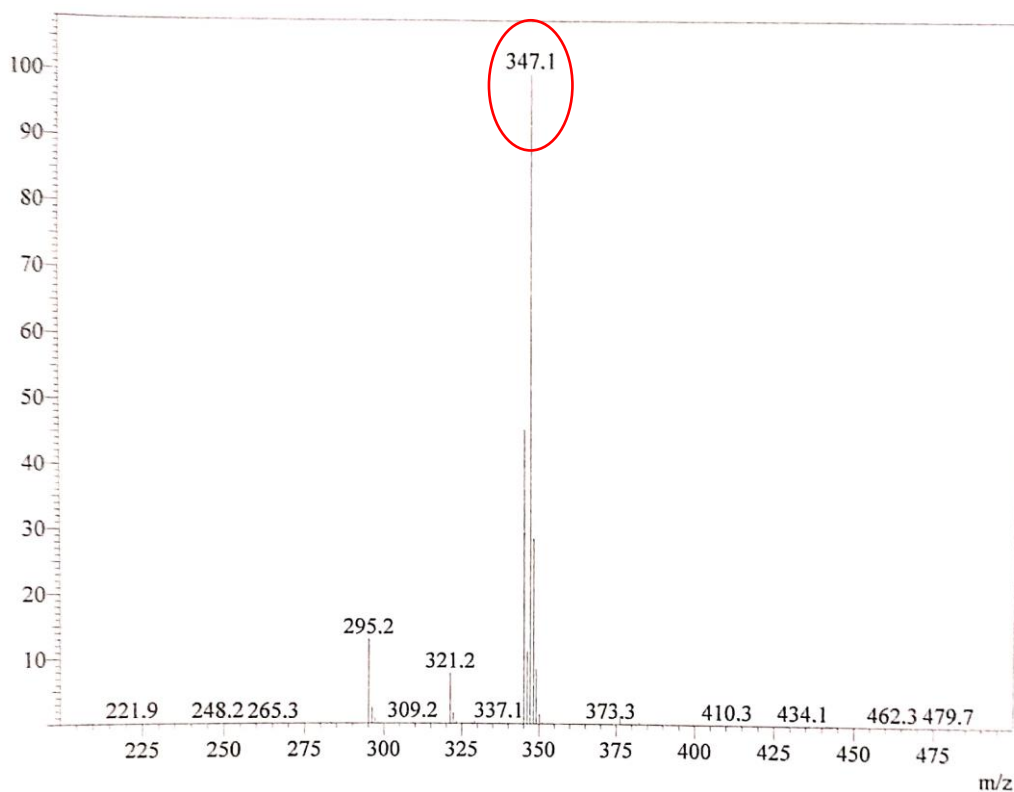

Figure S32. Mass Spectra (ESI) of SZI-3

## References

- (1) Cao, K.; Farahi, M.; Dakanali, M.; Chang, W. M.; Sigurdson, C. J.; Theodorakis, E. A.; Yang, J. *J. Am. Chem. Soc.* **2012**, 134, 42, 17338–17341.
- (2) Diner, I.; Dooyema J.; Gearing, M.; Walker, L. C.; Seyfried, N. T. *Bioconjugate Chemistry* **2017**, 28, 10, 2627-2637.
- (3) Fu, W.; Yan, C.; Guo, Z.; Zhang, J.; Zhang, H.; He, T.; Zhu, W. *J. Am. Chem. Soc.* **2019**, 141, 7, 3171–3177.
- (4) Li, M.; Zhao, A.; Ren, J.; Qu, X. *ACS Chem. Neurosci.* **2017**, 8, 6, 1299–1304.
- (5) Lv, G.; Sun, A.; Wei, P.; Zhang, N.; Lan H.; Yi T. *Chem. Commun.* **2016**, 52, 8865.
- (6) Li, Y.; Xu, D.; Sun, A.; Ho, S. L.; Poon, C. Y.; Chan, H. N.; Ng, O. T. W.; Yung, K. K. L.; Yan, H.; Li, H. W.; Wong, M. S. *Chem. Sci.* **2017**, 8, 8279-8284.
- (7) Guan, Y.; Cao, K. J.; Cantlon, A.; Elbel, K.; Theodorakis, E. A.; Walsh, D. M.; Yang, J.; Shah, J. V. *ACS Chem. Neurosci.* **2015**, 6, 9, 1503–1508.
- (8) Jung, S. J.; Lee, J. Y.; Kim, T. H.; Lee, D. E.; Jeon, J.; Yang, S. D.; Hur, M. G.; Min, J. J.; Park, Y. D. *Bioorg. Med. Chem. Lett.* **2016**, 26, 7, 1784-1788.
